# Supplementary material for: A robust COF@MXene membrane for ultra-high flux of water-in-oil emulsion separation
Source: Royal Society of Chemistry journal article supplement (doi:10.1039/d3cc01951a), 2023-01-01
Supplement: d3cc01951a1.pdf [file d3cc01951a1.pdf]

## Supporting Information

### **A robust COF@MXene membrane for ultra-high flux of water-in-oil emulsion separation**

Jing Wang<sup>a</sup>, Xiangqian Xu<sup>a</sup>, Yujian Zhou<sup>b</sup>, Wen Ma<sup>a</sup>, Fushan Wang<sup>a</sup>, Yongjun Zhou<sup>a</sup>,

Xuehu Men<sup>\*a</sup>

*a. School of Materials and Energy, Lanzhou University, Lanzhou, 730000, P. R.*

*China*

*b. Science and Technology on Low-Light-Level Night Vision Laboratory, Xi'an*

*710065, China*

\*Corresponding author.

E-mail: menxh@lzu.edu.cn (X. H. Men)

## **2. Experimental section**

### **2.1 Materials**

p-Phenylenediamine (PDA), Acetic acid, 1,3,5-Benzenetricarboxaldehyde (TFB), 1,4-Dioxane, Hydrogen fluoride, and  $\text{Ti}_3\text{AlC}_2$  were purchased from Shanghai Maclean Biochemical Co. Polyvinylidene fluoride (PVDF) film was purchased from Haiyan New Oriental Plastic Chemical Technology Co. Ethanol, n-hexane, methylbenzene, cyclohexane, heptane, dichloromethane (DCM), trichloromethane and span 80 were provided from Shuangshuang Chemical Co. (Yantai, China). Gasoline was purchased from petrol stations. All reagents were used without further purification.

### **2.2 Preparation of MXene**

1 g  $\text{Ti}_3\text{AlC}_2$  was added to 20 mL Hydrogen fluoride and stirred at a constant temperature of  $30^\circ\text{C}$  for 24 h. After etching, the obtained  $\text{Ti}_3\text{C}_2\text{T}_x$  (MXene) was washed by repeated centrifugation with a large amount of deionized water until the solution pH was  $> 6$ . The solution was dried in a vacuum drying oven. Then the obtained black powders were dried in a vacuum drying oven at  $60^\circ\text{C}$ .

### **2.3 Preparation of superhydrophobic COF@MXene membrane**

100 mg MXene, 40 mg TFB, 40 mg PDA, 200  $\mu\text{L}$  Acetic acid, and 30 mL 1,4-Dioxane were mixed together. The mixed solution was stirred at room temperature and pressure for 1-5 days. According to the change of wettability, two days was the optimum reaction time (Figure S1). The products were washed twice with dioxane and alcohol, and then the dried products were denoted as COF@MXene.

A homogeneous suspension was prepared by dispersing COF@MXene particles into absolute ethyl alcohol with the help of ultra-sonication. Subsequently, the superhydrophobic COF@MXene membrane was obtained by depositing COF@MXene particles onto PVDF membrane (1.2  $\mu\text{m}$ ) by vacuum filtration. The resulting COF@MXene membrane was dried at  $60^\circ\text{C}$ .

### **2.4 Process of emulsion separation**

The single-component water-in-oil emulsions were prepared by mixing water and oil (n-hexane, petroleum ether, dichloromethane, and dichloroethane) in the volume ratio of 1:100 under vigorous stirring for 4 h, Span-80 was added at a ratio of 0.2 g per 100 ml of the emulsion. For complex composition water-in-oil emulsions, 1 mL water corresponds to 99 mL of different oils (10 mL n-hexane, 20 mL methylbenzene, 10 mL

cyclohexane, 10 mL gasoline, 20 mL DCM, 20 mL trichloromethane), Span-80 was added at a ratio of 0.2 g per 100 ml of the emulsion. The emulsions separation process was carried out at 0.03 MPa. The permeation flux can be calculated by the following equation I:

$$J_g = \frac{V}{A \times \Delta t} \text{ \# I}$$

$$J_e = \frac{V}{A \times \Delta t \times P} \text{ \# II}$$

Where  $J_g$  ( $\text{Lm}^{-2}\text{h}^{-1}$ ) and  $J_e$  ( $\text{Lm}^{-2}\text{h}^{-1}\text{bar}^{-1}$ ) are the permeate fluxes under gravity-driven and external pressure-driven, respectively.  $V$  (L) is the volume of permeate in time  $\Delta t$  (h), and  $A$  is the effective separation area.  $P$  is the external pressure of 0.03 MPa.

The separation efficiency ( $\eta$ ) of the membrane was calculated according to the below equation II,

$$\eta = \frac{C_1 - C_2}{C_2} \times 100\% \text{ \# III}$$

where  $C_1$  is the feed emulsion concentration,  $C_2$  is the filtrate concentration.

## 2.5 Characterization

Scanning electron microscopy (SEM, Apreo S) was performed to observe the surface morphologies of  $\text{Ti}_3\text{AlC}_2$ ,  $\text{Ti}_3\text{C}_2\text{T}_x$ , and  $\text{COF@MXene}$ . The elements in  $\text{COF@MXene}$  were analyzed using energy-dispersive X-ray spectroscopy (EDS). The chemical compositions of the samples were characterized by Fourier-transform infrared spectroscopy (ATR-FTIR, Bruker, Tensor 27) and X-ray photoelectron spectroscopy (XPS, Kartos AXIS Ultra DLD with Al  $K\alpha$  X-ray Source,  $HV = 1486.6$  eV). The contact angles of water and oil were measured and observed by a goniometer (jgw-360b) with a 5  $\mu\text{L}$  water/oil drop. Thermogravimetric (TGA) analysis was performed to determine the thermal properties of the samples (NETZSCH STA 449F3,  $10.0^\circ\text{C}/\text{min}$ ,  $20^\circ\text{C}$ – $800^\circ\text{C}$ , air atmosphere). The X-ray diffraction (XRD, Philip X'Pert pro Diffractometer, with Cu  $K\alpha$  X-ray source,  $\lambda = 1.54056$  Å) was obtained at room temperature. All the optical images were captured using a mobile phone.

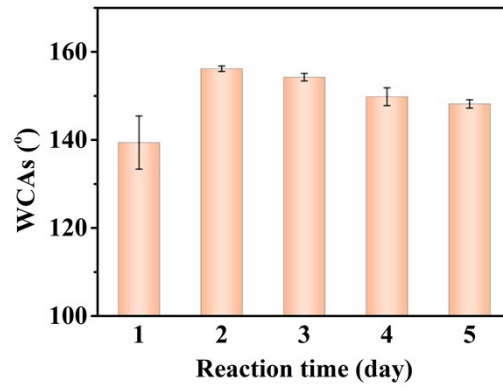

Figure S1. Wettability of COF@MXene under different reaction time.

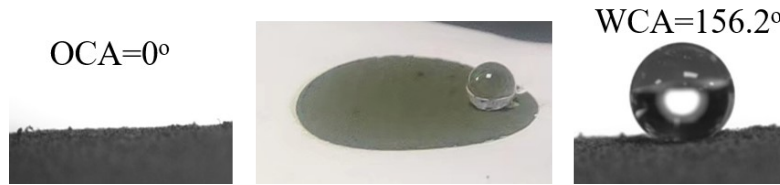

Figure S2. The wettability of COF@MXene membrane.

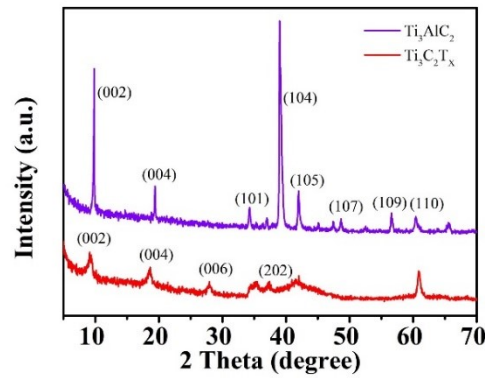

Figure S3. The XRD graph of  $\text{Ti}_3\text{AlC}_2$  and  $\text{Ti}_3\text{C}_2\text{T}_x$ -MXene.

According to the XRD pattern of pure MXene, the (002) peak was located at about  $2\theta=9.42^\circ$ , and the layer-to-layer spacing calculated by the Bragg equation is approximately 0.94 nm.

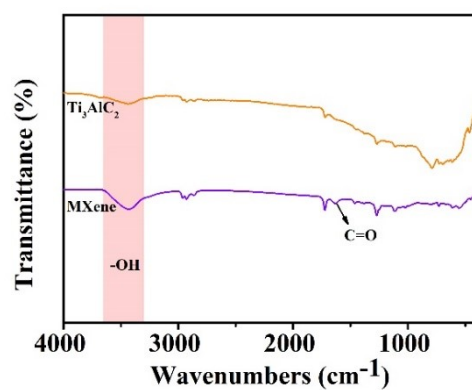

Figure S4. The FTIR graph of  $\text{Ti}_3\text{AlC}_2$  and MXene.

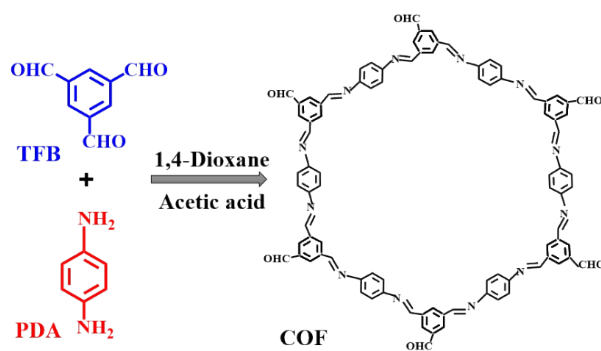

Figure S5. Synthesis process of COF.

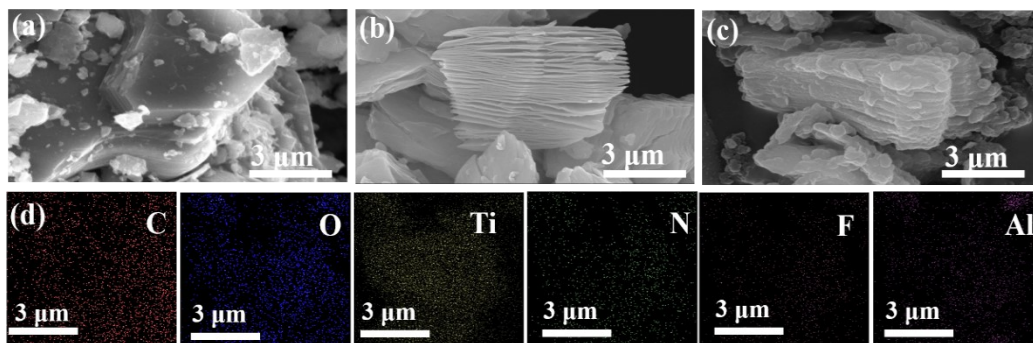

Figure S6. (a)-(c) SEM images of  $\text{Ti}_3\text{AlC}_2$ , MXene, and COF@MXene. (d) EDS pattern of COF@MXene.

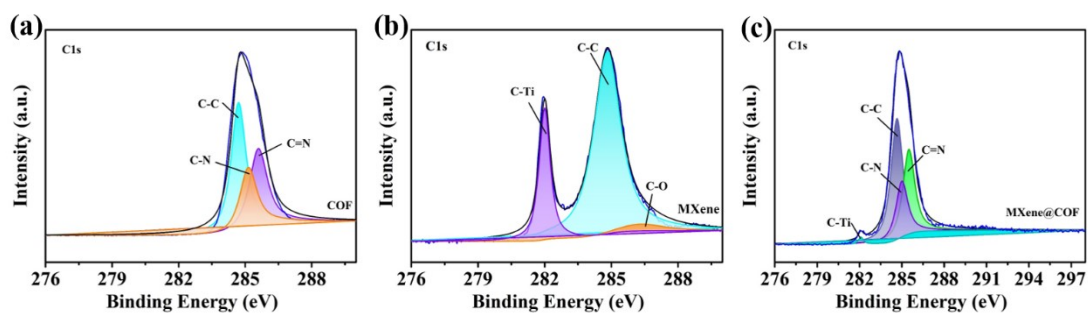

Figure S7.  $\text{C}1\text{s}$  XPS patterns of (a) MXene, (b) COF, and (c) COF@MXene.

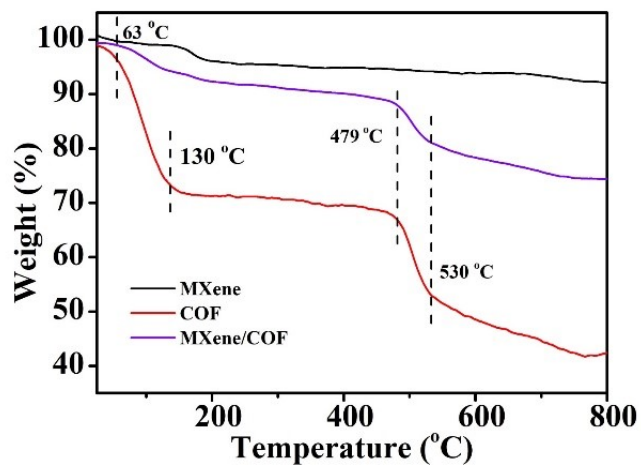

Figure S8. TGA results of COF, MXene, and COF@MXene.

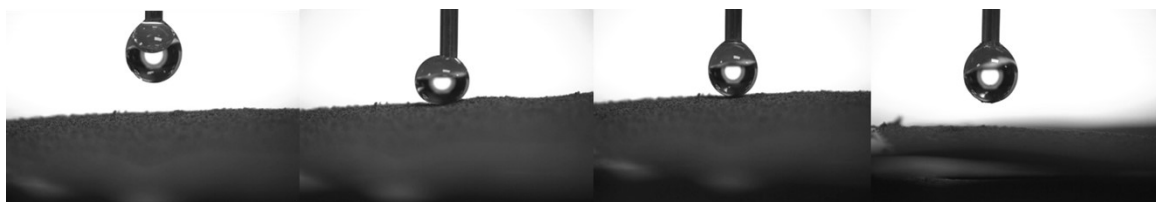

Figure S9. Dynamic contact process of a water droplet on the membrane surface.

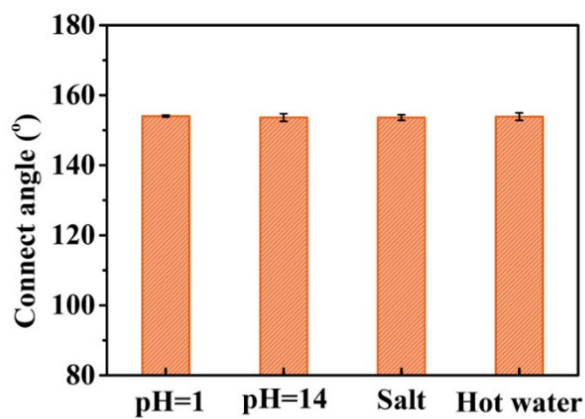

Figure S10. Variation in the water contact angles (WCAs) on COF@MXene with different chemical environments.

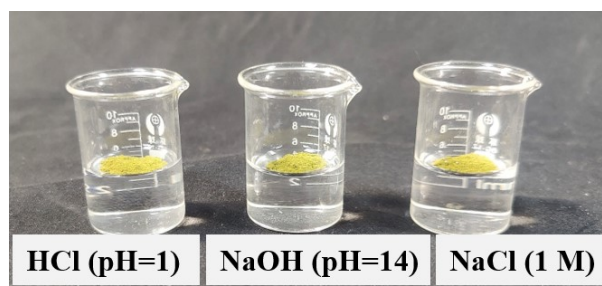

Figure S11. The COF@MXene powders were immersed in different chemical solutions.

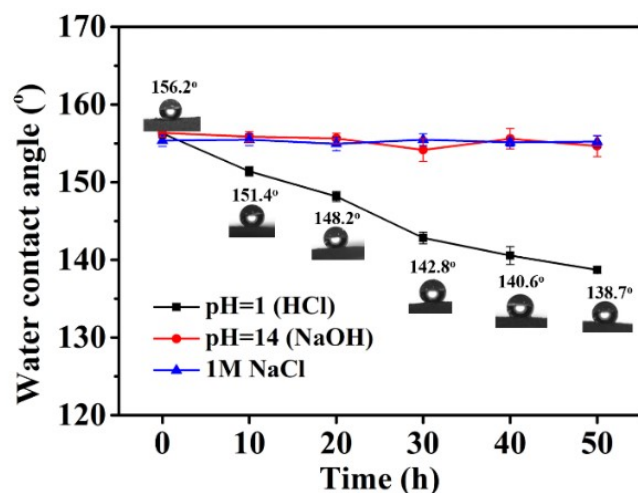

Figure S12. Variation of the WCAs of COF@MXene membrane at different immersion times.

The WCAs of water droplets with different chemical environments were greater than 150°. However, COF@MXene powders were immersed in acidic, alkaline, and salt solutions for 50 h, The COF@MXene powders were filtered into a membrane every ten hours and then tested for their WCAs. As can be seen in Figures S11 and S12, acidic solution destroyed hydrophobic structures, while other chemical solutions maintained stable superhydrophobicity.

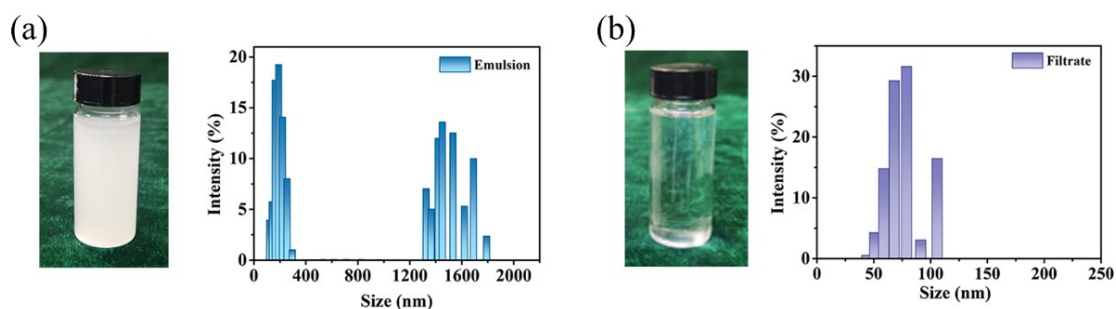

Figure S13. Droplet size distribution (a) before and (b) after COF@MXene membrane separation under external pressure drive.

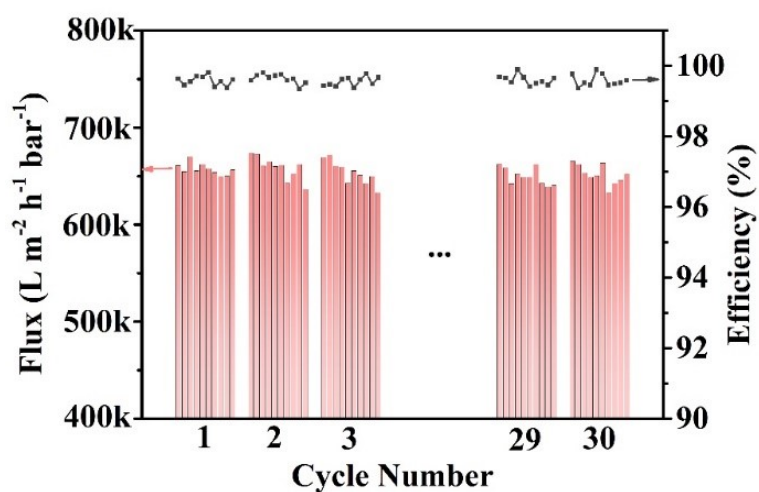

Figure S14. Cyclic adsorption characteristics of COF@MXene membrane for mixed water-in-oil emulsions under external pressure drive.

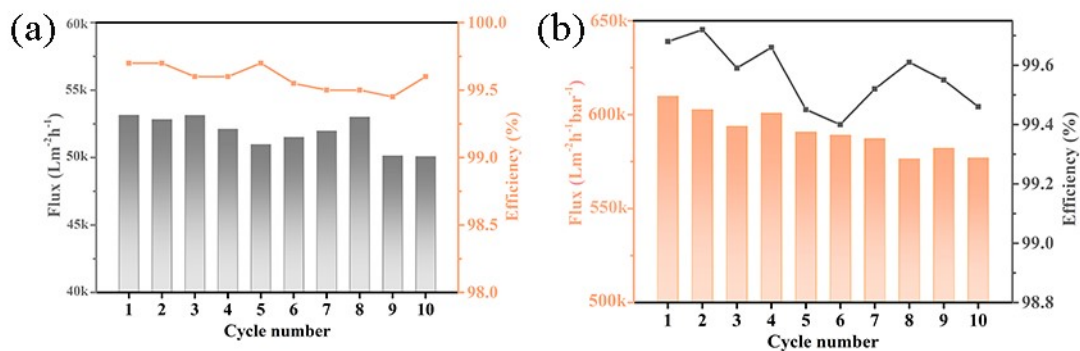

Figure S15. Separation performance of COF@MXene membrane for water-in-trichloromethane emulsion under gravity-driven and external pressure drive.

Table S1. Comparison of different COFs and MXene materials for oily water treatment.

|    | Material                                                                  | Mixtures seapration Flux  |                                                        | Emulsions separation Flux              |                                                         | Reference |
|----|---------------------------------------------------------------------------|---------------------------|--------------------------------------------------------|----------------------------------------|---------------------------------------------------------|-----------|
| 1  | Print paper-based MXene                                                   | -                         | -                                                      | Hexane-in-water                        | 682.3<br>$\text{Lm}^{-2}\text{h}^{-1}\text{bar}^{-1}$   | 1         |
| 2  | MXene@UIO-66-(COOH) <sub>2</sub>                                          | -                         | -                                                      | Multi-component pollutant oil-in-water | 713.37<br>$\text{Lm}^{-2}\text{h}^{-1}\text{bar}^{-1}$  | 2         |
| 3  | RGO/PDA/MXene                                                             | -                         | -                                                      | Water-in-mixing oil                    | 174.16<br>$\text{Lm}^{-2}\text{h}^{-1}\text{bar}^{-1}$  | 3         |
| 4  | Ultrathin 2D Ti <sub>3</sub> C <sub>2</sub> T <sub>x</sub> MXene membrane | -                         | -                                                      | Crude oil-in-water                     | 887<br>$\text{Lm}^{-2}\text{h}^{-1}\text{bar}^{-1}$     | 4         |
| 5  | Ultra-thin 2D titanium carbide MXene membrane                             | -                         | -                                                      | Toluene-in-water                       | 540<br>$\text{Lm}^{-2}\text{h}^{-1}\text{bar}^{-1}$     | 5         |
| 6  | CE-MXene-OH membrane                                                      | -                         | -                                                      | Toluene-in-water                       | 6385.93<br>$\text{Lm}^{-2}\text{h}^{-1}\text{bar}^{-1}$ | 6         |
| 7  | COF/GO <sub>50</sub> coatings                                             | water/<br>dichloromethane | 26,000<br>$\text{Lm}^{-2}\text{h}^{-1}\text{bar}^{-1}$ | -                                      | -                                                       | 7         |
| 8  | SSN-supported BTADHBD@Glc@POTS coating                                    | Organic solvents/water    | >70<br>$\text{Lm}^{-2}\cdot\text{s}^{-1}$              | -                                      | -                                                       | 8         |
| 9  | PAN/COF                                                                   | oil/water                 | 4229.29<br>$\text{Lm}^{-2}\text{h}^{-1}$               | Toluene-in-water                       | 1100<br>$\text{Lm}^{-2}\text{h}^{-1}$                   | 9         |
|    |                                                                           |                           |                                                        | water -in- Toluene                     | 1000<br>$\text{Lm}^{-2}\text{h}^{-1}$                   |           |
| 10 | COF-coated fabric                                                         | -                         | -                                                      | water-in-isooctane                     | 18 000<br>$\text{Lm}^{-2}\text{h}^{-1}$                 | 10        |
| 11 | COF@MXene                                                                 | -                         | -                                                      | water-in-trichloromethane emulsion     | 643200<br>$\text{Lm}^{-2}\text{h}^{-1}\text{bar}^{-1}$  | This work |

- Not reported

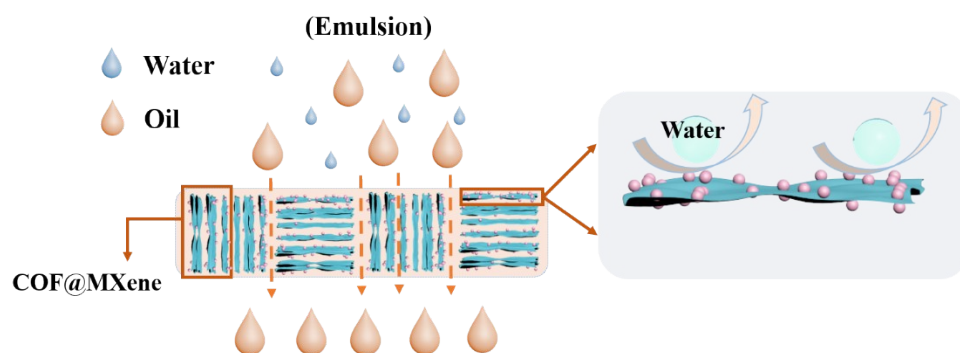

Figure S16. Schematic of the separation mechanism of COF@MXene membrane.

when water-in-oil emulsion contacted COF@MXene membrane, the oil phase could penetrate quickly due to its superlipophilic property. However, the size of trace water in emulsion was repelled to the membrane surface due to the

superhydrophobicity. Then the trace water accumulated on the membrane surface and gradually collected into larger droplets, achieving an efficient demulsification process.

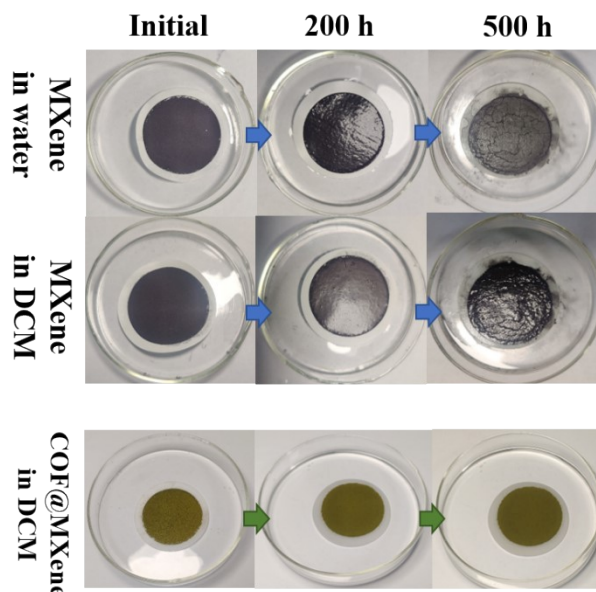

Figure S17. Photographs of the MXene and COF@MXene membrane before and after being immersed in water and dichloromethane (DCM) for 500 h.

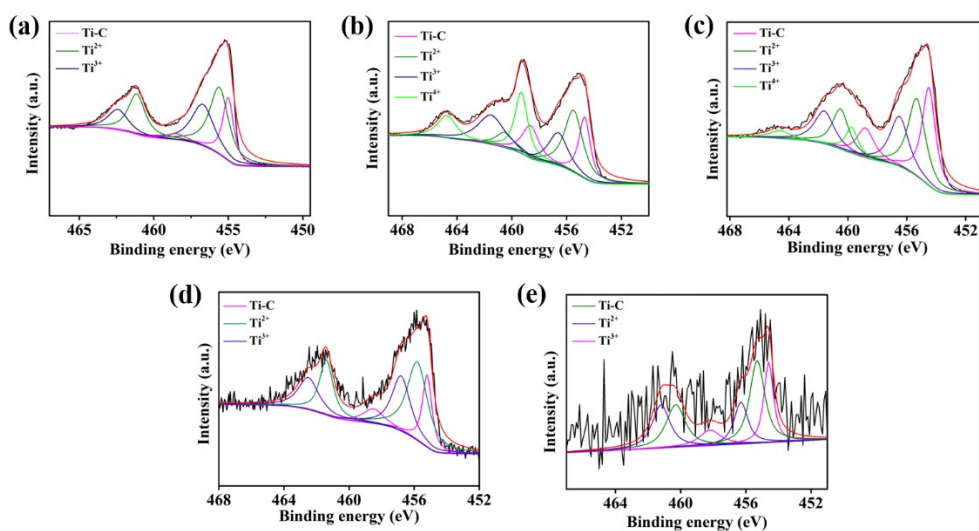

Figure S18. (a) Ti2p XPS of original MXene. Ti2p XPS of MXene after immersion in (b) water and (c) DCM for 500h. Ti2p XPS of COF@MXene (d) before and (e) after immersion for 500 h.

When compared to the original MXene, the peak intensity of Ti<sup>2+</sup> and Ti<sup>3+</sup> decreased and Ti irons transformed from low chemical valence into high chemical valence (Ti<sup>4+</sup>) after immersion, which was attributed to the oxidation of MXene<sup>11-13</sup>. It

is obvious that the oxidation of MXene is more serious after soaking in water. However, COF@MXene immersed in DCM for 500 h did not show significant oxidation.

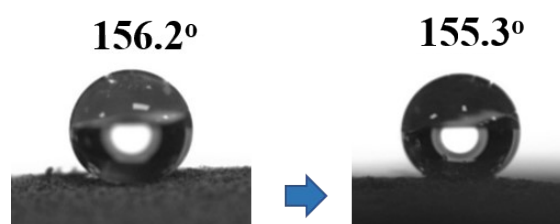

Figure S19. Wettability changes of COF@MXene membrane before and after immersion in DCM for 500 h.

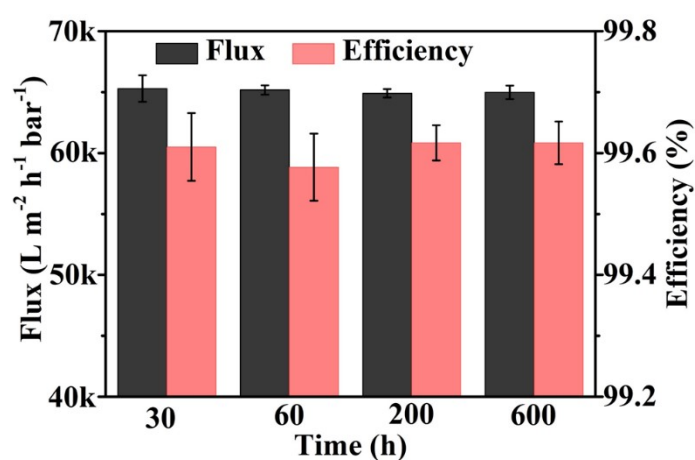

Figure S20. Separation performance of COF@MXene membrane soaked 500 h for separation of water-in-trichloromethane emulsion.

1. J. Saththasivam, K. Wang, W. Yiming, Z. Liu and K. A. Mahmoud, *RSC Advances*, 2019, **9**, 16296-16304.
2. S. He, Y. Zhan, J. Hu, G. Zhang, S. Zhao, Q. Feng and W. Yang, *Composites Part B: Engineering*, 2020, **197**.
3. X. Feng, Z. Yu, R. Long, Y. Sun, M. Wang, X. Li and G. Zeng, *Separation and Purification Technology*, 2020, **247**.
4. H. Zhang, Z. Wang, Y. Shen, P. Mu, Q. Wang and J. Li, *J Colloid Interface Sci*, 2020, **561**, 861-869.
5. Z.-K. Li, Y. Liu, L. Li, Y. Wei, J. Caro and H. Wang, *Journal of Membrane Science*, 2019, **592**.
6. X. Long, G. Zhao, J. Hu, Y. Zheng, J. Zhang, Y. Zuo and F. Jiao, *J Colloid Interface Sci*, 2022, **607**, 378-388.
7. H. Wang, M. Wang, Y. Wang, J. Wang, X. Men, Z. Zhang and V. Singh, *Separation and*

*Purification Technology*, 2021, **276**.

8. Y. Jiang, C. Liu, Y. Li and A. Huang, *Journal of Membrane Science*, 2019, **587**.
9. Z. Zhang, N. Han, L. Tan, Y. Qian, H. Zhang, M. Wang, W. Li, Z. Cui and X. Zhang, *Langmuir*, 2019, **35**, 16545-16554.
10. L. Chen, C. Zhou, H. Yang, J. Lin, Y. Ge, W. Zhou, C. Lu, L. Tan and L. Dong, *Chem Commun (Camb)*, 2021, **57**, 11533-11536.
11. Y. Zhou, M. Liu, Y. Wang, J. Yuan and X. Men, *Tribology International*, 2022, **165**.
12. X. Y. Wang, S. Y. Liao, H. P. Huang, Q. F. Wang, Y. Y. Shi, P. L. Zhu, Y. G. Hu, R. Sun and Y. J. Wan, *Small Methods*, 2023, **7**, e2201694.
13. V. Natu, J. L. Hart, M. Sokol, H. Chiang, M. L. Taheri and M. W. Barsoum, *Angew Chem Int Ed Engl*, 2019, **58**, 12655-12660.
